# Supplementary material for: Uncertainties in carbon emissions from land use and land cover change in Indonesia
Source: Copernicus journal article supplement (doi:10.5194/bg-22-3547-2025), 2025-07-25
Supplement: Supplementary file 1 [file Table_S1.xlsx]

## Sheet: params
Table S1 : all PFT set-up in JULES-ES
PFT parameter	Broadleaf deciduous tree	Broadleaf evergreen tropical	Broadleaf evergreen temperate	Needleleaf decidious tree	Needleleaf evergreen tree	C3 grass	C3 crop	C3 pasture	C4 grass	C4 crop	C4 pasture	Shrub decidious	Shrub evergreen	Definition (from JULES documentation)
a_wl_io	0.78	0.845	0.78	0.8	0.65	0.005	0.005	0.005	0.005	0.005	0.005	0.13	0.13	Allometric coefficient relating the target woody biomass to the leaf area index (kg carbon m-2).
a_ws_io	12	13	12	10	10	1	1	1	1	1	1	13	13	Woody biomass as a multiple of live stem biomass.
act_jmax_io	38800	64000	35900	38800	36400	112000	112000	112000	112000	112000	112000	38800	35900	Activation energy for temperature response of Jmax (J mol-1)
act_vcmax_io	49300	86900	59600	49300	63100	97200	97200	97200	97200	97200	97200	49300	59600	Activation energy for temperature response of Vcmax (J mol-1)
aef_io	0.48	0.29	0.43	0.87	0.87	0.29	0.07	0.07	0.43	0.07	0.07	1.2	1.2	Acetone Emission Factor (μg g-1 h-1).
albsnc_max_io	0.25	0.25	0.25	0.25	0.25	0.6	0.6	0.6	0.6	0.6	0.6	0.4	0.4	Snow-covered albedo for large leaf area index.
albsnc_min_io	0.3	0.3	0.3	0.3	0.3	0.8	0.8	0.8	0.8	0.8	0.8	0.8	0.8	Snow-covered albedo for zero leaf area index.
alnir_io	0.45	0.45	0.45	0.35	0.35	0.58	0.58	0.58	0.58	0.58	0.58	0.58	0.58	Leaf reflection coefficient for NIR. See HCTN30 Table 3.
alpar_io	0.1	0.1	0.1	0.07	0.07	0.1	0.1	0.1	0.1	0.1	0.1	0.1	0.1	Leaf reflection coefficient for VIS (photosyntehtically active radiation). See HCTN30 Table 3. Used when l_spec_albedo = TRUE.
alpha_io	0.064	0.064	0.048	0.08	0.064	0.048	0.048	0.048	0.04	0.04	0.04	0.064	0.048	Quantum efficiency (mol CO2 per mol PAR photons).
avg_ba_io	1700000	1700000	1700000	1700000	1700000	3200000	400000	3200000	3200000	400000	3200000	2700000	2700000	Average PFT Burnt Area per fire (m2).
b_wl_io	1.667	1.667	1.667	1.667	1.667	1.667	1.667	1.667	1.667	1.667	1.667	1.667	1.667	Allometric exponent relating the target woody biomass to the leaf area index. This is 5/3 in HCTN24 Eq.8.
c3_io	1	1	1	1	1	1	1	1	0	0	0	1	1	Flag indicating whether PFT is C3 type.
can_struct_a_io	1	1	1	1	1	1	1	1	1	1	1	1	1	Canopy structure factor (dimensionless). can_struct_a_io=1.0 indicates a structurally homogeneous canopy. Corresponds to the structure factor Zeta in Pinty et al 2006 except assumed not to vary with zenith angle i.e. b=0. The canopy structure factor has no effect if can_rad_mod = 1.
canht_ft_io	10	10	10	10	10	10	10	10	10	10	10	10	10	The height of each PFT (m), also known as the canopy height. The value read here is only used if TRIFFID is not active (l_triffid = FALSE).
catch0_io	0.5	0.5	0.5	0.5	0.5	0.5	0.5	0.5	0.5	0.5	0.5	0.5	0.5	Minimum canopy capacity (kg m-2).
ccleaf_max_io	1	1	1	1	1	1	1	1	1	1	1	1	1	Leaf maximum combustion completeness.
ccleaf_min_io	0.8	0.8	0.8	0.8	0.8	0.8	0.8	0.8	0.8	0.8	0.8	0.8	0.8	Leaf minimum combustion completeness.
ccwood_max_io	0.4	0.4	0.4	0.4	0.4	0.4	0.4	0.4	0.4	0.4	0.4	0.4	0.4	Wood maximum combustion completeness.
ccwood_min_io	0	0	0	0	0	0	0	0	0	0	0	0	0	Wood minimum combustion completeness.
ci_st_io	35.64	35.64	36.27	35.64	35.64	37.71	37.71	37.71	32.21	32.21	32.21	35.64	33.46	Leaf-internal CO2concentration at standard conditions (Pa),
dcatch_dlai_io	0.05	0.05	0.05	0.05	0.05	0.05	0.05	0.05	0.05	0.05	0.05	0.05	0.05	Rate of change of canopy capacity with LAI (kg m-2).
dgl_dm_io	0	0	0	0	0	0	0	0	0	0	0	0	0	Rate of change of leaf turnover rate with moisture availability.
dgl_dt_io	9	9	9	9	9	0	0	0	0	0	0	9	9	Rate of change of leaf turnover rate with temperature (K-1).
dqcrit_io	0.09	0.09	0.09	0.041	0.06	0.051	0.051	0.051	0.075	0.075	0.075	0.03	0.044	Critical humidity deficit (kg H2O per kg air).
dz0v_dh_io	0.05	0.05	0.05	0.05	0.05	0.1	0.1	0.1	0.1	0.1	0.1	0.1	0.1	Rate of change of vegetation roughness length for momentum with height.
emis_pft_io	0.98	0.98	0.98	0.98	0.98	0.98	0.98	0.98	0.98	0.98	0.98	0.98	0.98	Surface emissivity.
eta_sl_io	0.01	0.01	0.01	0.01	0.01	0.01	0.01	0.01	0.01	0.01	0.01	0.01	0.01	Live stemwood coefficient (kg C/m/(m2 leaf)).
f0_io	0.875	0.875	0.892	0.875	0.875	0.931	0.931	0.931	0.8	0.8	0.8	0.875	0.875	CI / CA for DQ = 0. See HCTN 24 Eq. 32.
fd_io	0.01	0.01	0.01	0.015	0.015	0.019	0.019	0.019	0.019	0.019	0.019	0.015	0.015	Scale factor for dark respiration. See HCTN 24 Eq. 56.
fef_bc_io	0.52	0.52	0.56	0.56	0.56	0.56	0	0.56	0.37	0	0.37	0.56	0.56	Fire BC Emission Factor (g kg-1).
fef_ch4_io	5.07	5.07	3.92	5.96	3.92	3.92	0	3.92	1.94	0	1.94	3.92	5.96	Fire CH4 Emission Factor (g kg-1).
fef_co2_io	1643	1643	1637	1489	1637	1637	0	1637	1686	0	1686	1637	1489	Fire CO2 Emission Factor (g kg-1).
fef_co_io	93	93	89	127	89	89	0	89	63	0	63	89	127	Fire CO Emission Factor (g kg-1).
fef_nox_io	2.55	2.55	2.51	0.9	2.51	2.51	0	2.51	3.9	0	3.9	2.51	0.9	Fire NOx Emission Factor (g kg-1).
fef_oc_io	4.71	4.71	8.2	8.2	8.2	8.2	0	8.2	2.62	0	2.62	8.2	8.2	Fire OC Emission Factor (g kg-1).
fef_so2_io	0.4	0.4	0.4	0.4	0.4	0.4	0	0.4	0.48	0	0.48	0.4	0.4	Fire SO2 Emission Factor (g kg-1).
fsmc_mod_io	0	0	0	0	0	0	0	0	0	0	0	0	0	Switch for method of weighting the contribution that different soil layers make to the soil moisture availability factor fsmc.
fsmc_of_io	0	0	0	0	0	0	0	0	0	0	0	0	0	Moisture availability below which leaves are dropped.
fsmc_p0_io	0	0	0	0	0	0	0	0	0	0	0	0	0	Pft-dependent parameter governing the threshold at which the plant starts to experience water stress due to lack of water in the soil. Only used if l_use_pft_psi = F.
g1_stomata_io	4.45	5.31	3.37	2.35	2.35	5.25	5.25	5.25	1.62	1.62	1.62	5.47	3.29	Parameter g1 for the Medlyn model of stomatal conductance (kPa0.5)
g_leaf_0_io	0.25	0.25	0.5	0.25	0.25	3	3	3	3	3	3	0.25	0.66	Minimum turnover rate for leaves (/360days).
glmin_io	1e-06	1e-06	1e-06	1e-06	1e-06	1e-06	1e-06	1e-06	1e-06	1e-06	1e-06	1e-06	1e-06	Minimum leaf conductance for H2O (m s-1).
gpp_st_io	1.66e-07	1.58e-07	1.59e-07	1.01e-07	1.19e-07	2.61e-07	2.61e-07	2.61e-07	1.41e-07	1.41e-07	1.38e-07	2.1e-07	2.22e-07	Gross primary production (GPP) at standard conditions (kgC m-2 s-1),
hw_sw_io	0.5	0.5	0.5	0.5	0.5	0.5	0.5	0.5	0.5	0.5	0.5	0.5	0.5	Ratio of N stem to N heartwood (kgN/kgN) from the TRY database.
ief_io	35	24	16	8	8	16	5	5	24	5	5	10	20	Isoprene Emission Factor (μg g-1 h-1).
infil_f_io	4	4	4	4	4	2	2	2	2	2	2	2	2	Infiltration enhancement factor. The maximum infiltration rate defined by the soil parameters for the whole gridbox may be modified for each PFT to account for tile-dependent factors, such as macro-pores related to vegetation roots.
kext_io	0.5	0.5	0.5	0.5	0.5	0.5	0.5	0.5	0.5	0.5	0.5	0.5	0.5	Light extinction coefficient - used with Beer’s Law for light absorption through tile canopies. See HCTN30 Eq.3.
kn_io	0.78	0.78	0.78	0.78	0.78	0.78	0.78	0.78	0.78	0.78	0.78	0.78	0.78	Parameter for decay of nitrogen through the canopy, as a function of layers. Only used if can_rad_mod = 4 or 5.
knl_io	0.2	0.2	0.2	0.2	0.2	0.2	0.2	0.2	0.2	0.2	0.2	0.2	0.2	Parameter for decay of nitrogen through the canopy, as a function of LAI. Only used if can_rad_mod = 6.
kpar_io	0.5	0.5	0.5	0.5	0.5	0.5	0.5	0.5	0.5	0.5	0.5	0.5	0.5	PAR Extinction coefficient (m2 leaf / m2 ground).
lai_alb_lim_io	0.005	0.005	0.005	0.005	0.005	0.005	0.005	0.005	0.005	0.005	0.005	0.005	0.005	Minimum LAI permitted in calculation of the albedo in snow-free conditions.
lai_io	1	1	1	1	1	1	1	1	1	1	1	1	1	The leaf area index (LAI) of each PFT. The value read here is only used if neither phenology nor TRIFFID is active (l_phenol = FALSE and l_triffid = FALSE).
lma_io	0.0823	0.1036	0.1403	0.1006	0.2263	0.0495	0.0495	0.0495	0.137	0.137	0.137	0.0709	0.1515	Leaf mass per unit area (kgLeaf m-2). Only used if l_trait_phys = T.
mef_io	1	0.6	0.9	1.8	1.8	0.6	2	2	0.9	2	2	4.5	4.5	Methanol Emission Factor (μg g-1 h-1).
neff_io	0.0008	0.0008	0.0008	0.0008	0.0008	0.0008	0.0008	0.0008	0.0004	0.0004	0.0004	0.0008	0.0008	Scale factor relating Vcmax with leaf nitrogen concentration. See HCTN 24 Eq. 51. Only used if l_trait_phys = F.
nl0_io	0.046	0.046	0.046	0.033	0.033	0.073	0.073	0.073	0.06	0.06	0.06	0.06	0.06	Top leaf nitrogen concentration (kg N/kg C). Only used if l_trait_phys = F.
nmass_io	0.021	0.017	0.0144	0.0186	0.0115	0.024	0.024	0.024	0.0113	0.0113	0.0113	0.0218	0.0136	Top leaf nitrogen content per unit mass (kgN kgLeaf-1). Only used if l_trait_phys = T.
nr_io	0.01726	0.01726	0.01726	0.00784	0.00784	0.0162	0.0162	0.0162	0.0084	0.0084	0.0084	0.0172	0.0172	Root nitrogen concentration (kgN/kgC). Only used if l_trait_phys = T.
nr_nl_io	0.67	0.67	0.67	0.67	0.67	0.72	0.72	0.72	0.72	0.72	0.72	0.67	0.67	Ratio of root nitrogen concentration to leaf nitrogen concentration.
ns_nl_io	0.1	0.1	0.1	0.1	0.1	1	1	1	1	1	1	0.1	0.1	Ratio of stem nitrogen concentration to leaf nitrogen concentration.
nsw_io	0.0072	0.0072	0.0072	0.0083	0.0083	0.01604	0.01604	0.01604	0.0202	0.0202	0.0202	0.0072	0.0072	Stemwood nitrogen concentration (kgN/kgC). Only used if l_trait_phys = T.
omega_io	0.15	0.15	0.15	0.15	0.15	0.15	0.15	0.15	0.17	0.17	0.17	0.15	0.15	Leaf scattering coefficient for PAR. Used when l_spec_albedo = TRUE.
omnir_io	0.7	0.7	0.7	0.45	0.45	0.83	0.83	0.83	0.83	0.83	0.83	0.83	0.83	Leaf scattering coefficient for NIR. Used when l_spec_albedo = TRUE.
orient_io	0	0	0	0	0	0	0	0	0	0	0	0	0	Flag indicating leaf angle distribution. 0. Spherical. 1. Horizontal.
q10_leaf_io	2	2	2	2	2	2	2	2	2	2	2	2	2	Q10 factor for plant respiration.
r_grow_io	0.25	0.25	0.25	0.25	0.25	0.25	0.25	0.25	0.25	0.25	0.25	0.25	0.25	Growth respiration fraction.
rootd_ft_io	2	3	2	2	1.8	0.5	0.5	0.5	0.5	0.5	0.5	0.5	0.5	Parameter determining the root depth (m).
sigl_io	0.0375	0.0375	0.0375	0.1	0.1	0.025	0.025	0.025	0.05	0.05	0.05	0.05	0.05	Specific density of leaf carbon (kg C/m2 leaf). Only used if l_trait_phys = F.
tef_io	1.33	1.2	1.2	2.4	2.4	0.8	0.2	0.2	1.7	0.2	0.2	1.25	1	Monoterpene Emission Factor (μg g-1 h-1).
tleaf_of_io	280	278.15	233.15	278.15	233.15	278.15	278.15	278.15	278.15	278.15	278.15	280	233.15	Temperature below which leaves are dropped (K).
tlow_io	10	13	13	-10	0	10	10	10	13	13	13	10	0	Lower temperature for photosynthesis (deg C).
tupp_io	43	43	43	26	32	32	32	32	45	45	45	40	36	Upper temperature for photosynthesis (deg C).
vint_io	7.56	7.21	3.9	6.32	6.32	6.42	6.42	6.42	0	0	0	14.71	14.71	There is a linear relationship between Vcmax and Narea. Previously Vcmax was calculated as the product of nl0 and neff. This is now replaced by a linear regression based on data reported in Kattge et al. 2009. Vint is the y-intercept, vsl is the slope. Units: μmol CO2 m-2 s-1. Only used if l_trait_phys = T.
vsl_io	31.22	19.22	28.4	23.79	18.15	40.96	40.96	40.96	20.48	20.48	20.48	23.15	23.15	Slope in the linear regression between Vcmax and Narea. Units: μmol CO2 m-2 s-1. Only used if l_trait_phys = T.
z0hm_classic_pft	0.1	0.1	0.1	0.1	0.1	0.1	0.1	0.1	0.1	0.1	0.1	0.1	0.1	Ratio of the roughness length for heat to the roughness length for momentum for the CLASSIC aerosol scheme only.
z0hm_pft_io	0.1	0.1	0.1	0.1	0.1	0.1	0.1	0.1	0.1	0.1	0.1	0.1	0.1	Ratio of the roughness length for heat to the roughness length for momentum.
