# Supplementary material for: Uncertainties in carbon emissions from land use and land cover change in Indonesia
Source: Copernicus journal article supplement (doi:10.5194/bg-22-3547-2025), 2025-07-25
Supplement: Supplementary file [file bg-22-3547-2025-supplement-title-page.pdf › bg-22-3547-2025-supplement-title-page.pdf]

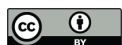

## *Supplement of*

# **Uncertainties in carbon emissions from land use and land cover change in Indonesia**

**Ida Bagus Mandhara Brasika et al.**

*Correspondence to:* Ida Bagus Mandhara Brasika ([i.brasika@exeter.ac.uk](mailto:i.brasika@exeter.ac.uk))

- [bg-22-3547-2025-supplement-title-page.pdf](#)
- [Supplement.pdf](#)
- [Table\\_S1.xlsx](#)

The copyright of individual parts of the supplement might differ from the article licence.
